# Supplementary material
Source: PubMed Central journal article supplement (PMC6786921)

Figure S1

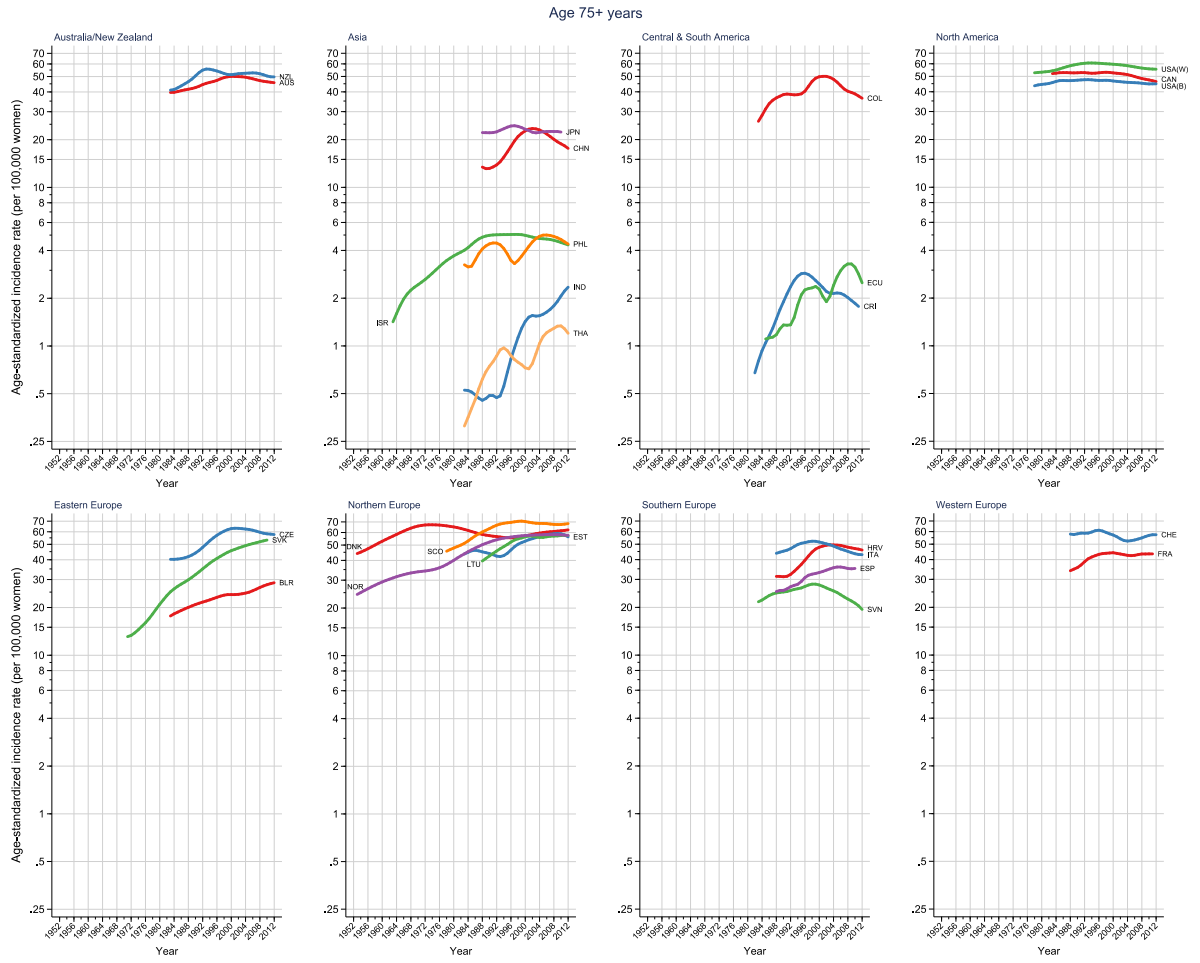

Figure S2

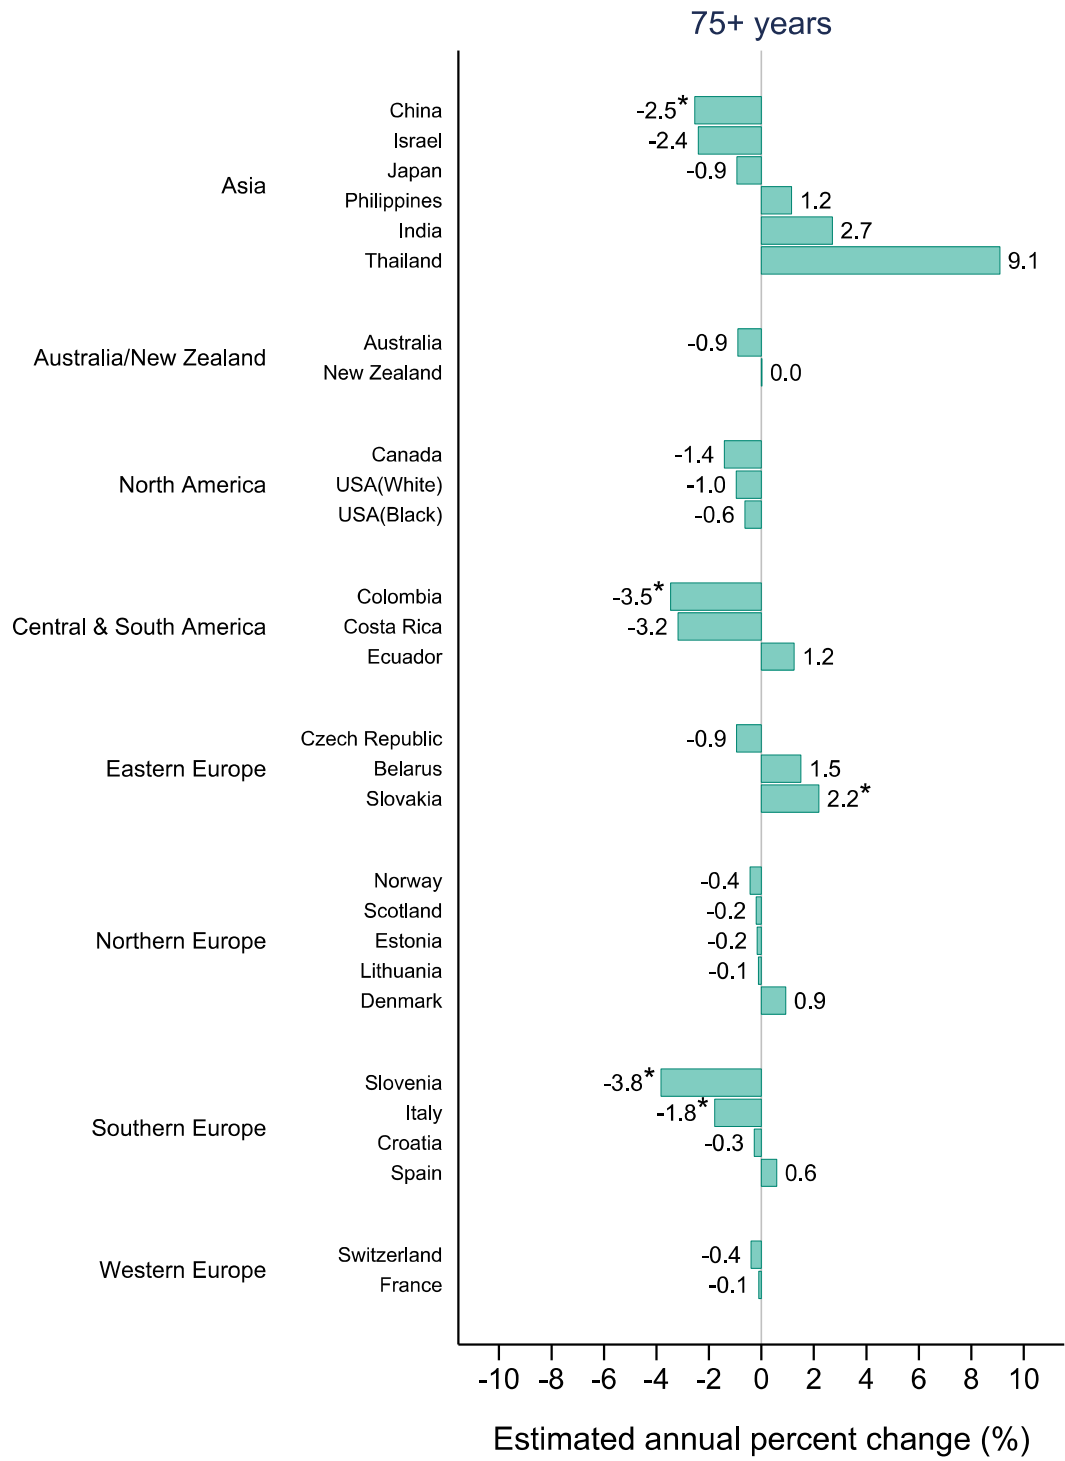

Figure S3

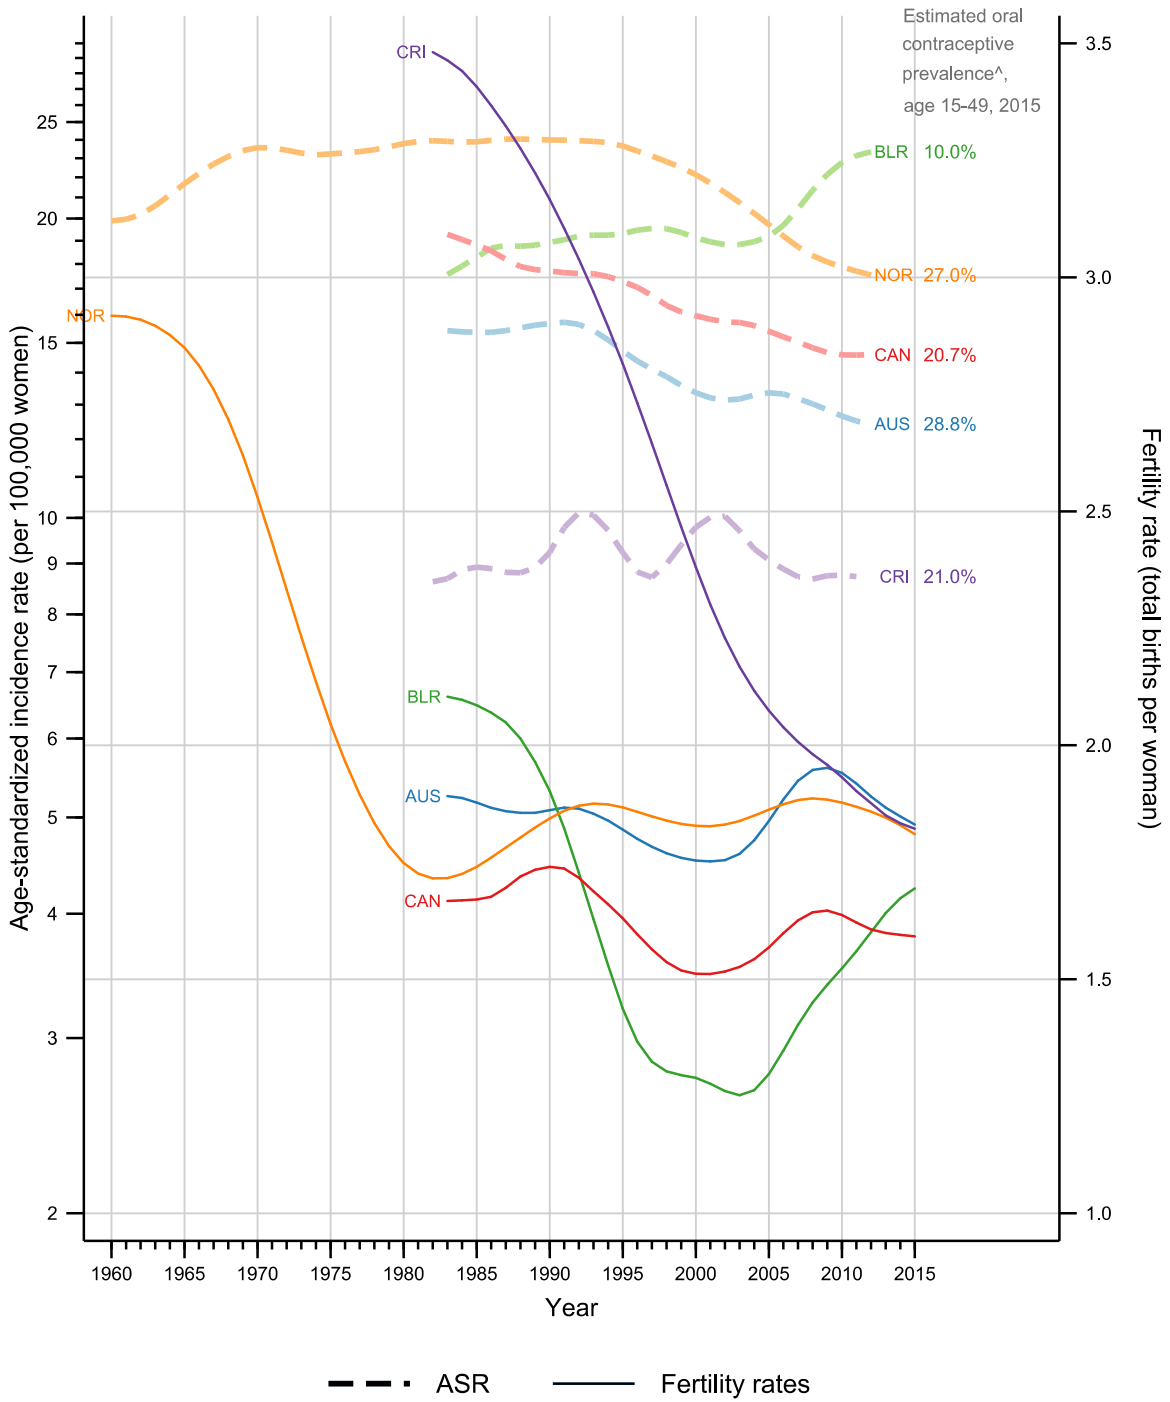

Figure S4

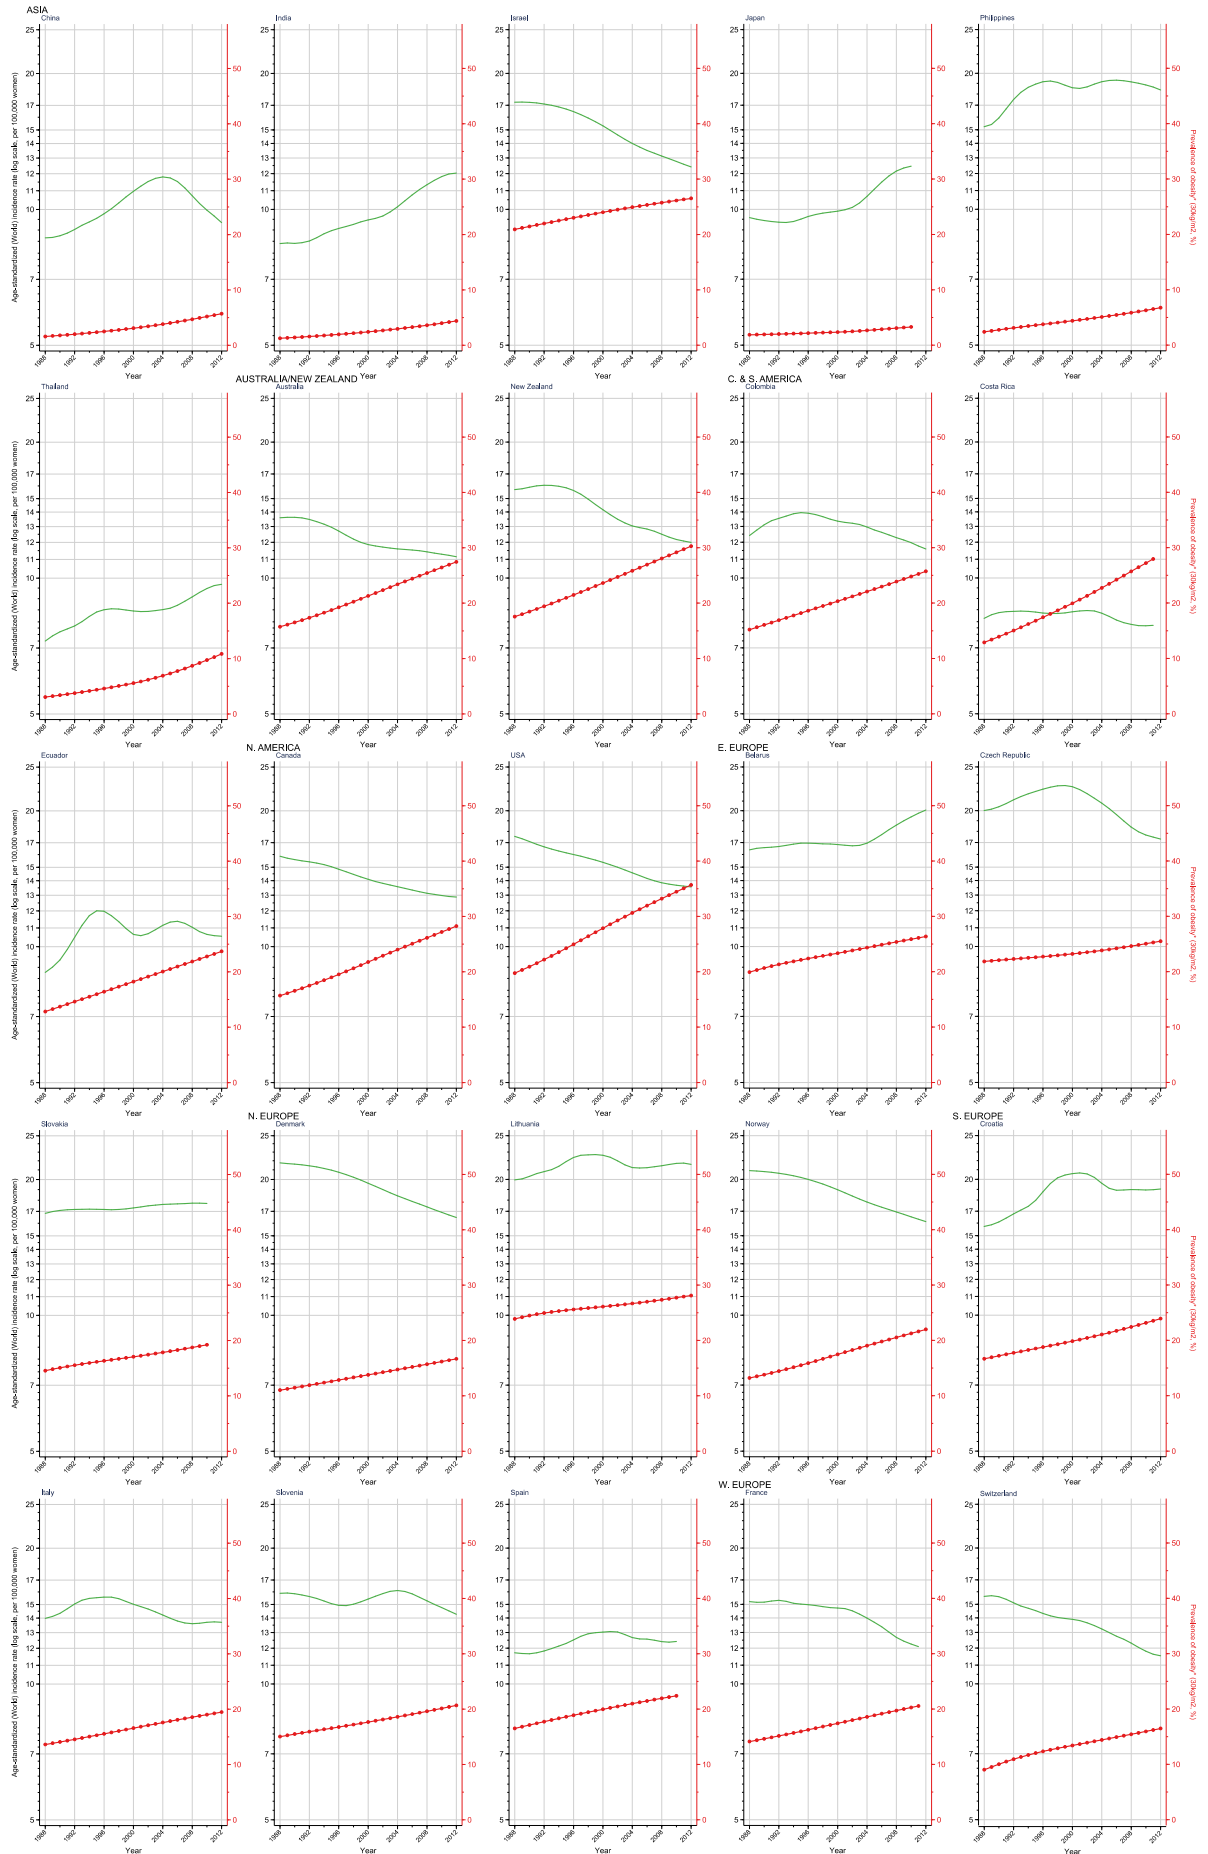

Figure S5

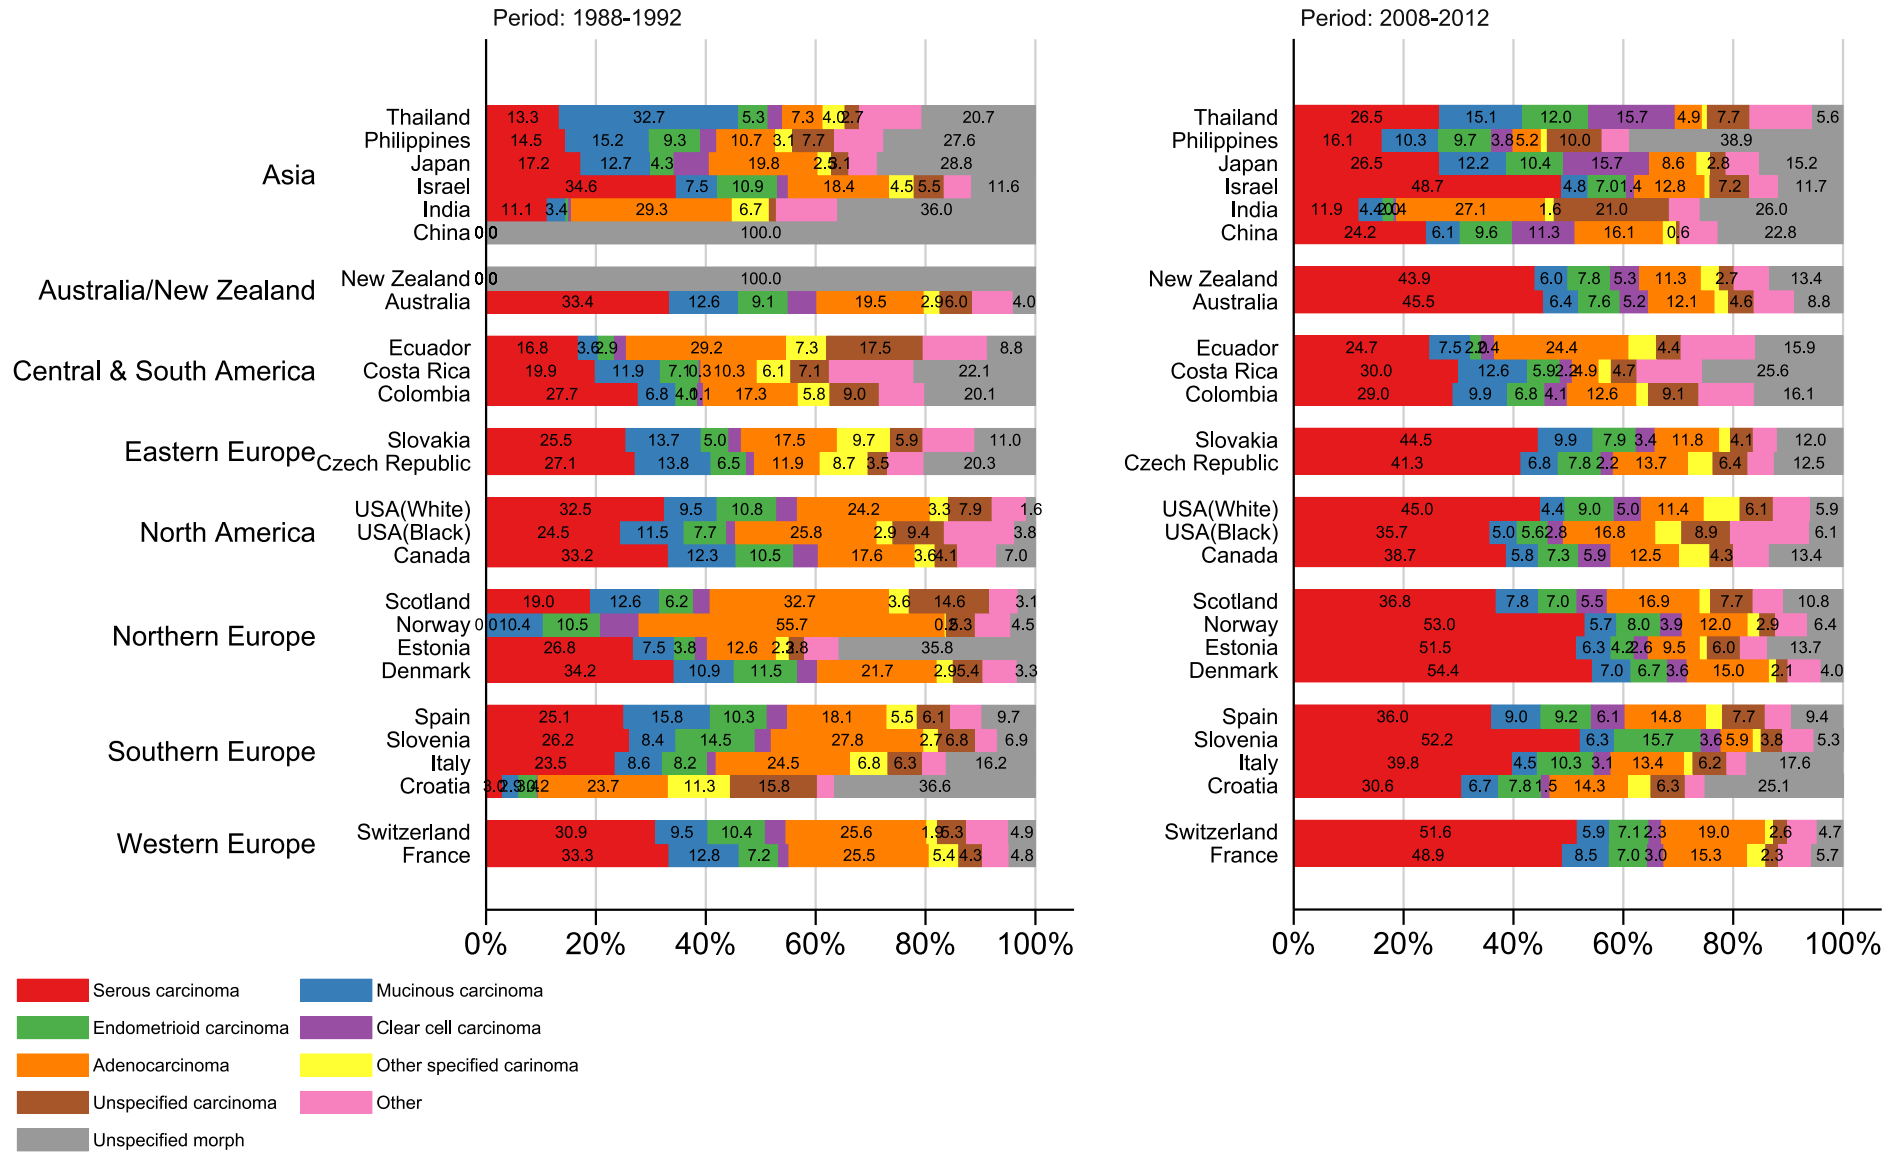

Supplement: NIHMS1039991-supplement-S1-S5.pdf [file NIHMS1039991-supplement-S1-S5.pdf]
